# Supplementary material for: Investigation of the Spatial Structure of Flufenamic Acid in Supercritical Carbon Dioxide Media via 2D NOESY
Source: MDPI journal article supplement (doi:10.3390/ma16041524), 2023-02-11
Supplement: s1 [file s1]

## Supplementary Materials

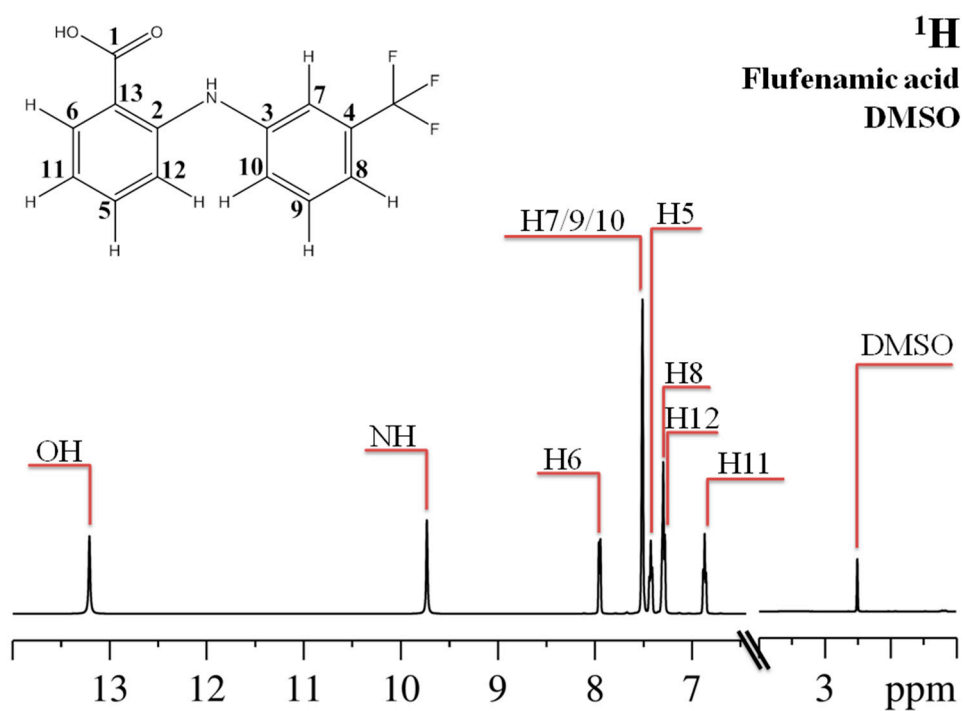

**Figure S1.** <sup>1</sup>H NMR spectrum of FFA in DMSO-d<sub>6</sub> was recorded on a Bruker Avance III spectrometer, 500 MHz, in the frequency range of 20 ppm.

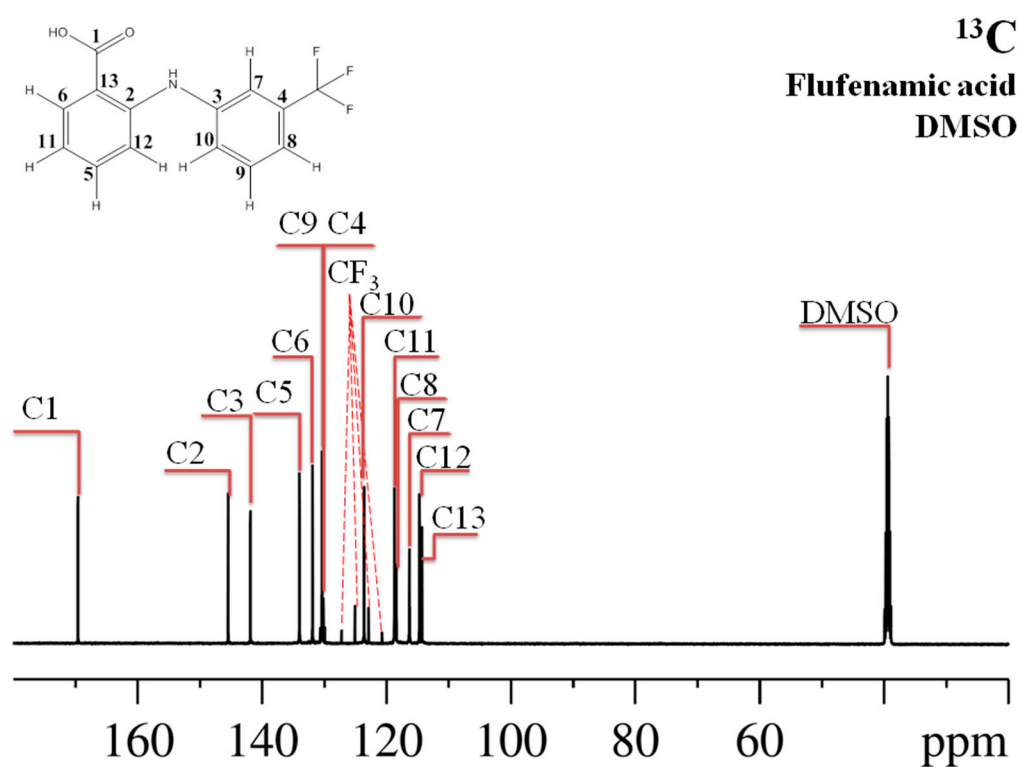

**Figure S2.** <sup>13</sup>C NMR spectrum of FFA in DMSO-d<sub>6</sub> was recorded on a Bruker Avance III spectrometer, 500 MHz, in the frequency range of 276 ppm.

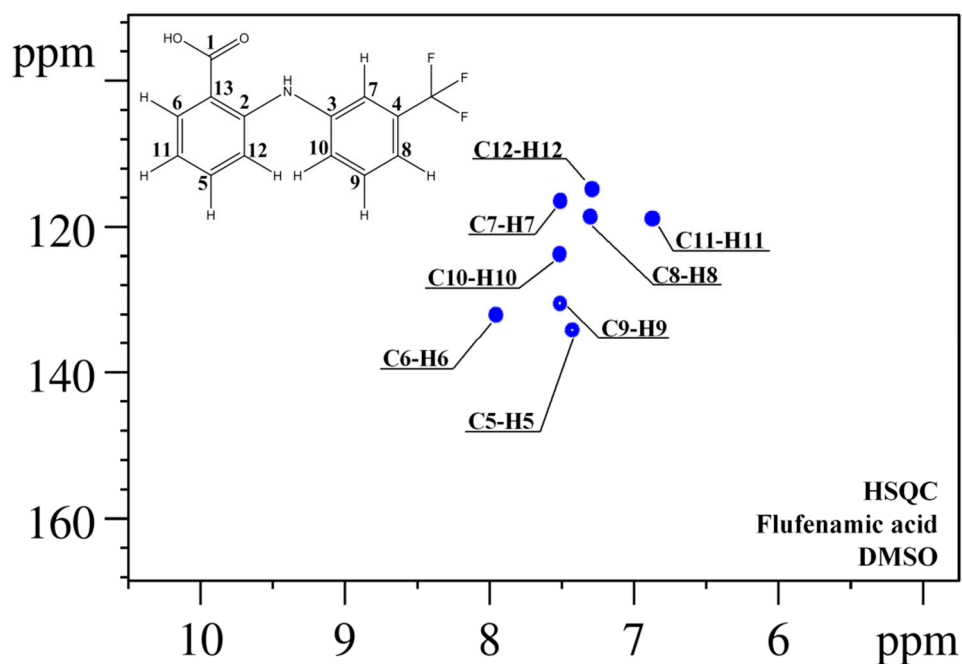

**Figure S3.**  $^1\text{H}$ - $^{13}\text{C}$  HSQC spectrum of FFA in DMSO- $d_6$  was recorded on a Bruker Avance III spectrometer, 500 MHz, in the frequency range of  $20 \times 276$  ppm.

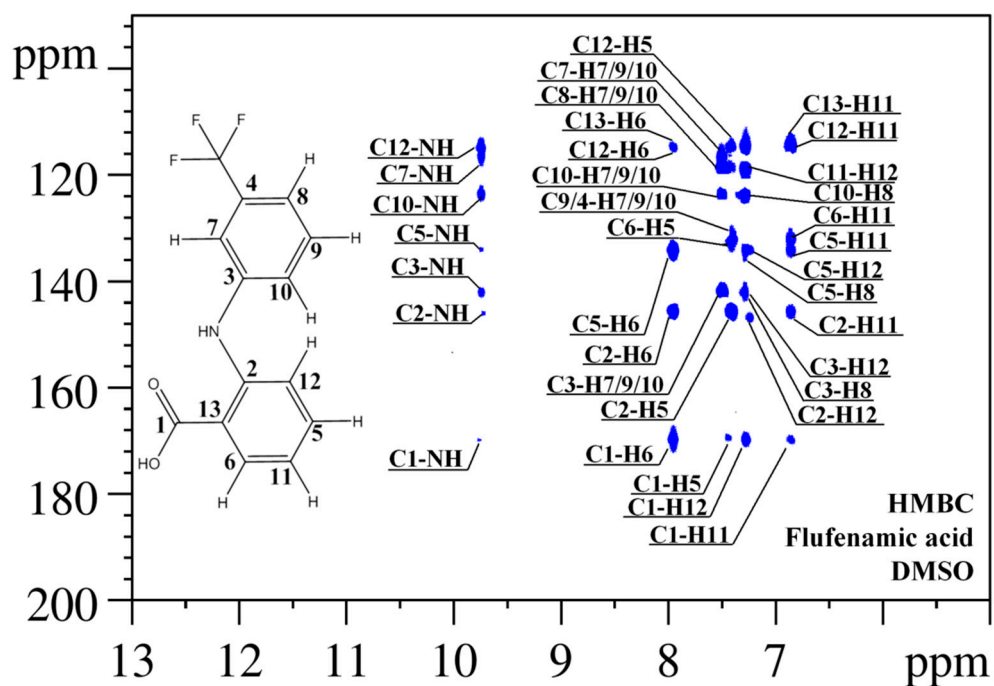

**Figure S4.**  $^1\text{H}$ - $^{13}\text{C}$  HMBC spectrum of FFA in DMSO- $d_6$  was recorded on a Bruker Avance III spectrometer, 500 MHz, in the frequency range of  $20 \times 276$  ppm.

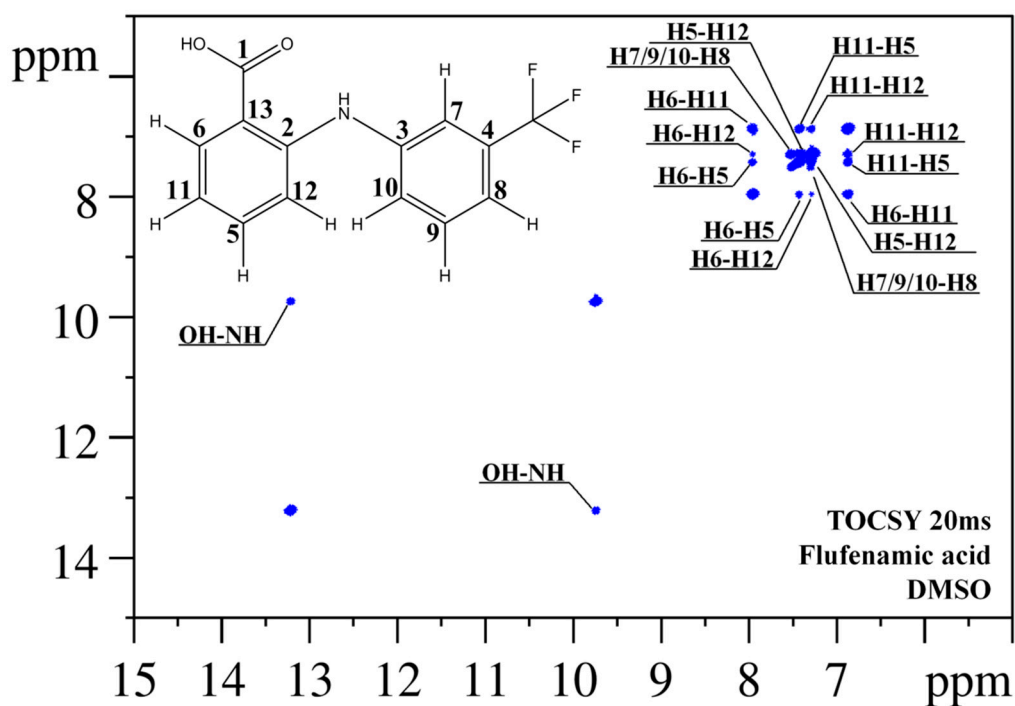

**Figure S5.**  $^1\text{H}$ - $^1\text{H}$  TOCSY spectrum (mixing time parameter—20 ms) of FFA in  $\text{DMSO-d}_6$  was recorded on a Bruker Avance III spectrometer, 500 MHz, in the frequency range of  $20 \times 20$  ppm.

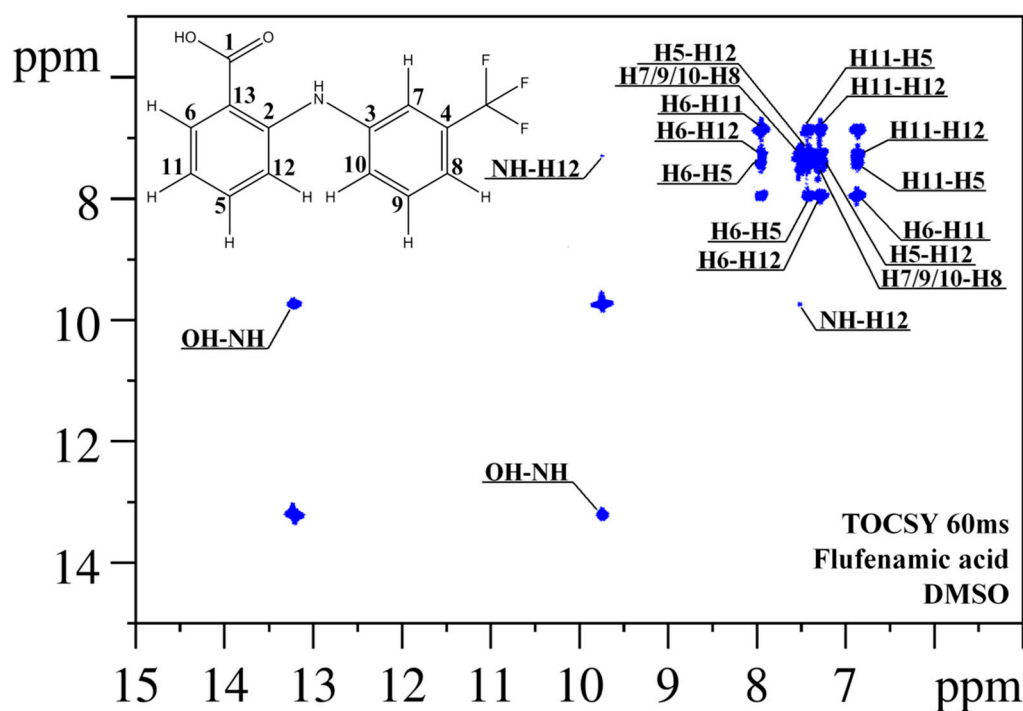

**Figure S6.**  $^1\text{H}$ - $^1\text{H}$  TOCSY spectrum (mixing time parameter—60 ms) of FFA in  $\text{DMSO-d}_6$  was recorded on a Bruker Avance III spectrometer, 500 MHz, in the frequency range of  $20 \times 20$  ppm.

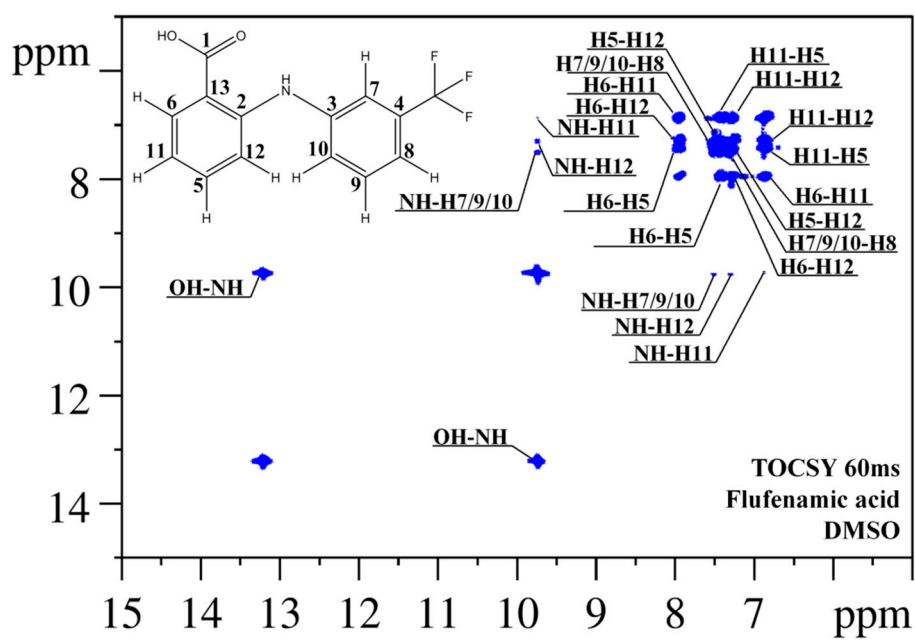

**Figure S7.**  $^1\text{H}$ - $^1\text{H}$  TOCSY spectrum (mixing time parameter—100 ms) of FFA in  $\text{DMSO-d}_6$  was recorded on a Bruker Avance III spectrometer, 500 MHz, in the frequency range of  $20 \times 20$  ppm.

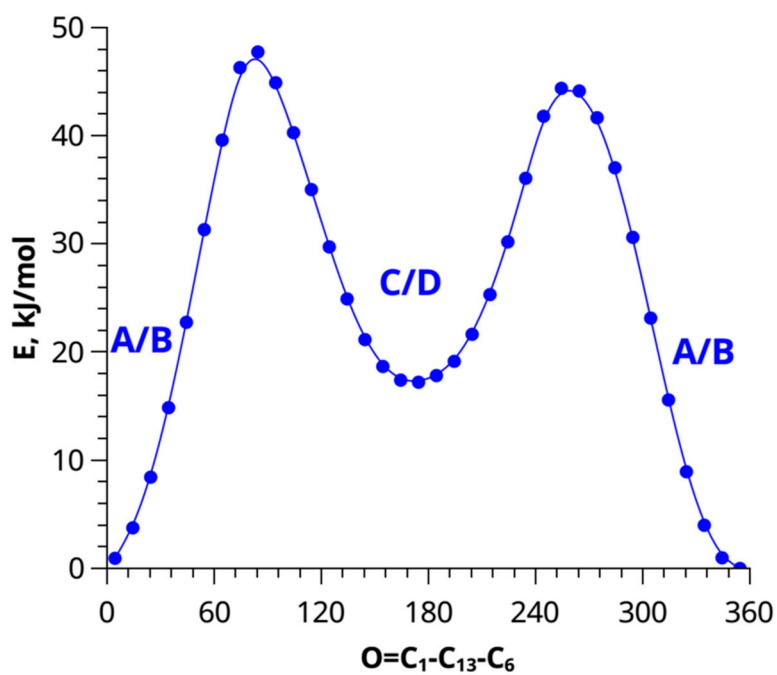

**Figure S8.** Results of quantum chemical calculations demonstrating barriers of intramolecular rotation associated with conformers A(B) and C(D) along the  $\text{O}=\text{C}_1\text{-C}_{13}\text{-C}_6$  angle in the FFA molecule.

**Table S1.** Chemical shifts in the 1D NMR spectra and intramolecular interactions determined from the 2D spectra of the FFA molecule in DMSO.

| <sup>13</sup> C | $\delta$ <sup>13</sup> C, ppm | <sup>1</sup> H | $\delta$ <sup>1</sup> H, ppm | HSQC    | HMBC                                        | TOCSY                     |                           |                                | NOESY                        |
|-----------------|-------------------------------|----------------|------------------------------|---------|---------------------------------------------|---------------------------|---------------------------|--------------------------------|------------------------------|
|                 |                               |                |                              |         |                                             | 20 ms                     | 60 ms                     | 100ms                          |                              |
| C1              | 169.62                        | OH             | 13.21                        | -       | C1-NH<br>C1-H6<br>C1-H5<br>C1-H12<br>C1-H11 | OH-NH                     | OH-NH                     | OH-NH                          | OH-NH<br>OH-H6<br>OH-H7/9/10 |
| C2              | 145.47                        | -              | -                            | -       | C2-NH<br>C2-H6<br>C2-H5<br>C2-H11<br>C2-H12 | -                         | -                         | -                              | -                            |
| C3              | 141.89                        | -              | -                            | -       | C3-NH<br>C3-H7/9/10<br>C3-H8<br>C3-H12      | -                         | -                         | -                              | -                            |
| C5              | 133.99                        | H5             | 7.43                         | C5-H5   | C5-NH<br>C5-H6<br>C5-H8<br>C5-H11<br>C5-H12 | H5-H12                    | H5-H12                    | H5-H12                         | H5-H11                       |
| C6              | 131.90                        | H6             | 7.95                         | C6-H6   | C6-H5<br>C6-H11                             | H6-H5<br>H6-H12<br>H6-H11 | H6-H5<br>H6-H12<br>H6-H11 | H6-H5<br>H6-H12<br>H6-H11      | H6-H11                       |
| C7              | 116.33                        | H7/9/10        | 7.51                         | C7-H7   | C7-NH<br>C7-H7/9/10                         | H7/9/10-H8                | H7/9/10-H8                | H7/9/10-H8                     | H7/9/10-<br>H8/12            |
| C9              | 132.34                        |                |                              | C9-H9   | C9/4-H7/9/10                                |                           |                           |                                |                              |
| C10             | 122.61                        |                |                              | C10-H10 | C10-NH<br>C10-H7/9/10<br>C10-H8             |                           |                           |                                |                              |
| C4              | 130.26<br>127.24              | -              | -                            | -       | -                                           | -                         | -                         | -                              | -                            |
| CF <sub>3</sub> | 125.09<br>122.91<br>120.74    | -              | -                            | -       | -                                           | -                         | -                         | -                              | -                            |
| C11             | 118.73                        | H11            | 6.87                         | C11-H11 | C11-H12                                     | H11-H5<br>H11-H12         | H11-H5<br>H11-H12         | H11-H5<br>H11-H12              | -                            |
| C8              | 118.46                        | H8             | 7.30                         | C8-H8   | C8-H7/9/10                                  | -                         | -                         | -                              | -                            |
| C12             | 114.71                        | H12            | 7.28                         | C12-H12 | C12-NH<br>C12-H5<br>C12-H6<br>C12-H11       | -                         | -                         | -                              | -                            |
| C13             | 114.31                        | -              | -                            | -       | C13-H6<br>C13-H5<br>C13-H11<br>C13-H12      | -                         | -                         | -                              | -                            |
| -               | -                             | NH             | 9.73                         | -       | -                                           | -                         | NH-H12                    | NH-H11<br>NH-H12<br>NH-H7/9/10 | NH-H6<br>NH-H7/9/10          |

**Table S2.** Dihedral angles  $\tau_1[\text{C}_2\text{-N-C}_3\text{-C}_7]$  and respective molecular structures comprising eight polymorphic forms of FFA.

| Polymorph | $\tau_1[\text{C}_2\text{-N-C}_3\text{-C}_7], ^\circ$ | Conformer Structure                                                                  |
|-----------|------------------------------------------------------|--------------------------------------------------------------------------------------|
| FFA I     | -131.71                                              | 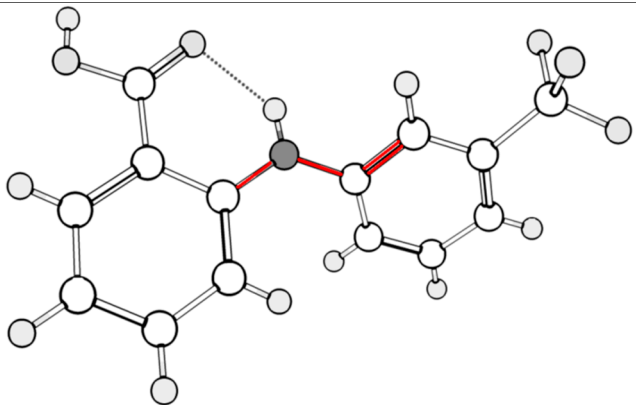   |
| FFA II    | 141.30                                               |   |
| FFA III   | -8.35                                                |  |
| FFA IV    | 147.52 <sup>a</sup>                                  |                                                                                      |
|           | -142.67 <sup>b</sup>                                 |                                                                                      |

|         |                      |                                                                                      |
|---------|----------------------|--------------------------------------------------------------------------------------|
|         |                      | 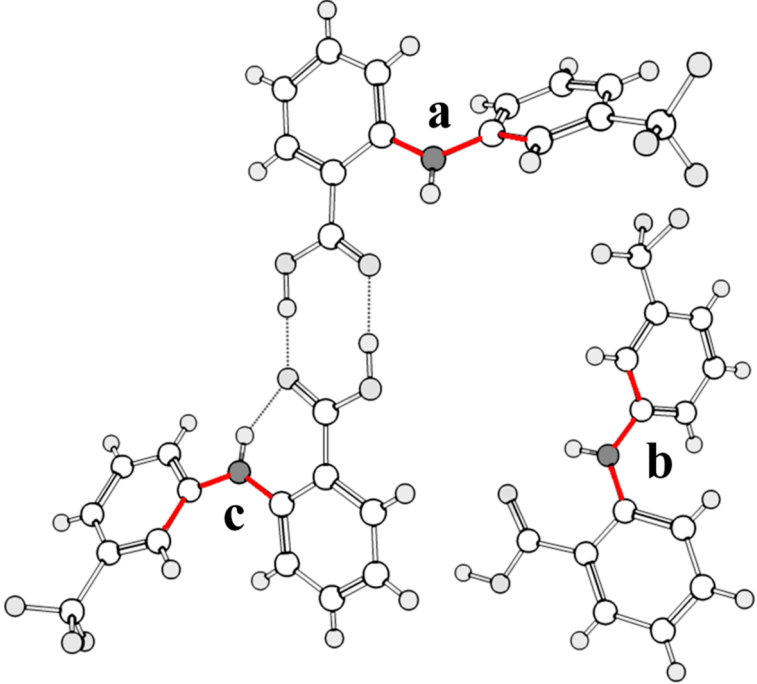   |
|         | 28.84 <sup>c</sup>   |                                                                                      |
| FFA V   | 155.85 <sup>a</sup>  |   |
|         | 143.15 <sup>b</sup>  |                                                                                      |
|         | 145.18 <sup>c</sup>  |                                                                                      |
|         | 153.91 <sup>d</sup>  |                                                                                      |
| FFA VI  | 24.50 <sup>a</sup>   |  |
|         | 145.84 <sup>b</sup>  |                                                                                      |
|         | -147.42 <sup>c</sup> |                                                                                      |
|         | -27.56 <sup>d</sup>  |                                                                                      |
|         | 140.70 <sup>e</sup>  |                                                                                      |
|         | -148.63 <sup>f</sup> |                                                                                      |
| FFA VII | -43.34 <sup>a</sup>  |                                                                                      |

---

41.66 <sup>b</sup>

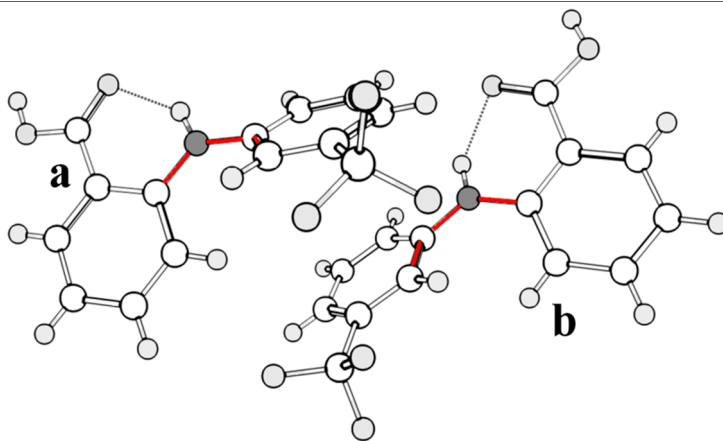

---

-25.31 <sup>a</sup>

---

-38.26 <sup>b</sup>

---

143.97 <sup>c</sup>

---

-32.55 <sup>d</sup>

FFA VIII

---

40.95 <sup>e</sup>

---

21.12 <sup>f</sup>

---

35.29 <sup>g</sup>

---

27.43 <sup>h</sup>

---

28.86 <sup>i</sup>

---

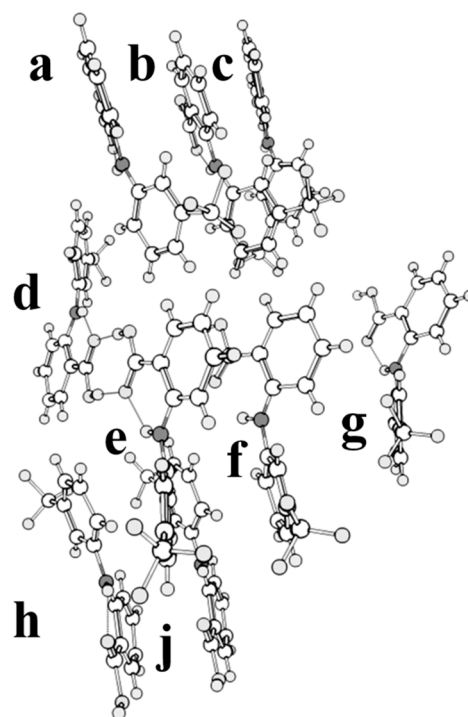



**Table S3.** Normalized integral intensities of the cross-peaks, cross-relaxation rates and inter-proton distances in the FFA molecule used to calculate the conformer populations in DMSO-d<sub>6</sub>.

| Groups | $r_{\text{calc}}, \text{\AA}$ | Dist.           | Mixing Time | Relative<br>Integral<br>Intensity | Cross-Relaxation Rate, $\text{s}^{-1}$ | $r_{\text{exp}}, \text{\AA}$ |
|--------|-------------------------------|-----------------|-------------|-----------------------------------|----------------------------------------|------------------------------|
| A-D    | 2.47                          | H6-H11<br>(Ref) | 0.05        | 0.0037                            | $3.89 \pm 0.14 \times 10^{-2}$         | -                            |
|        |                               |                 | 0.10        | 0.0057                            |                                        |                              |
|        |                               |                 | 0.15        | 0.0076                            |                                        |                              |
|        |                               |                 | 0.20        | 0.0092                            |                                        |                              |
|        |                               |                 | 0.25        | 0.0118                            |                                        |                              |
|        |                               |                 | 0.30        | 0.0144                            |                                        |                              |
|        |                               |                 | 0.35        | 0.0152                            |                                        |                              |
|        |                               |                 | 0.40        | 0.0166                            |                                        |                              |
|        |                               |                 | 0.45        | 0.0207                            |                                        |                              |
|        |                               |                 | 0.50        | 0.0216                            |                                        |                              |
|        |                               |                 | 0.55        | 0.0246                            |                                        |                              |
|        |                               |                 | 0.60        | 0.0247                            |                                        |                              |
|        |                               |                 | 0.65        | 0.0269                            |                                        |                              |
|        |                               |                 | 0.70        | 0.028                             |                                        |                              |
|        |                               |                 | 0.75        | 0.0317                            |                                        |                              |
|        |                               |                 | 0.80        | 0.0329                            |                                        |                              |
| A+C    | 2.48                          | NH-H7           | 0.05        | 0.0017                            | $2.05 \pm 0.05 \times 10^{-2}$         | $2.75 \pm 0.03$              |
|        |                               |                 | 0.10        | 0.003                             |                                        |                              |
|        |                               |                 | 0.15        | 0.0047                            |                                        |                              |
|        |                               |                 | 0.20        | 0.0058                            |                                        |                              |
|        |                               |                 | 0.25        | 0.0067                            |                                        |                              |
|        |                               |                 | 0.30        | 0.0078                            |                                        |                              |
|        |                               |                 | 0.35        | 0.0085                            |                                        |                              |
|        |                               |                 | 0.40        | 0.0093                            |                                        |                              |
|        |                               |                 | 0.45        | 0.0104                            |                                        |                              |
|        |                               |                 | 0.50        | 0.0111                            |                                        |                              |
| B+D    | 3.58                          |                 | 0.55        | 0.0116                            |                                        |                              |
|        |                               |                 | 0.60        | 0.0131                            |                                        |                              |
|        |                               |                 | 0.65        | 0.0139                            |                                        |                              |
|        |                               |                 | 0.70        | 0.0158                            |                                        |                              |
|        |                               |                 | 0.75        | 0.0171                            |                                        |                              |
|        |                               |                 | 0.80        | 0.0181                            |                                        |                              |

**Table S4.** Normalized integral intensities of the cross-peaks, cross-relaxation rates and inter-proton distances in the FFA molecule used to calculate the conformer populations in SC-CO<sub>2</sub>+DMSO-d<sub>6</sub>.

| Groups | $r_{\text{calc}}, \text{\AA}$ | Dist.           | Mixing Time | Relative<br>Integral<br>Intensity | Cross-Relaxation rate, s <sup>-1</sup> | $r_{\text{exp}}, \text{\AA}$ |
|--------|-------------------------------|-----------------|-------------|-----------------------------------|----------------------------------------|------------------------------|
| A-D    | 2.47                          | H6-H11<br>(Ref) | 0.10        | 0.0048                            | $3.89 \pm 0.14 \times 10^{-2}$         | -                            |
|        |                               |                 | 0.20        | 0.0103                            |                                        |                              |
|        |                               |                 | 0.30        | 0.0097                            |                                        |                              |
|        |                               |                 | 0.40        | 0.013                             |                                        |                              |
|        |                               |                 | 0.50        | 0.0211                            |                                        |                              |
|        |                               |                 | 0.60        | 0.0233                            |                                        |                              |
|        |                               |                 | 0.70        | 0.0252                            |                                        |                              |
|        |                               |                 | 0.80        | 0.0306                            |                                        |                              |
|        |                               |                 | 0.90        | 0.0327                            |                                        |                              |
| A+C    | 2.48                          | NH-H7           | 0.10        | 0.0026                            | $2.05 \pm 0.05 \times 10^{-2}$         | $2.75 \pm 0.03$              |
|        |                               |                 | 0.20        | 0.0031                            |                                        |                              |
|        |                               |                 | 0.30        | 0.0042                            |                                        |                              |
|        |                               |                 | 0.40        | 0.0044                            |                                        |                              |
|        |                               |                 | 0.50        | 0.005                             |                                        |                              |
|        |                               |                 | 0.60        | 0.0062                            |                                        |                              |
|        |                               |                 | 0.70        | 0.0074                            |                                        |                              |
|        |                               |                 | 0.80        | 0.0088                            |                                        |                              |
| B+D    | 3.58                          |                 | 0.90        | 0.0099                            |                                        |                              |
